# Supplementary material for: Stereo-chemical analysis of racemization of a chiral bipyridine
Source: Royal Society of Chemistry journal article supplement (doi:10.1039/c3ra45645e), 2013-01-01
Supplement: c3ra45645e.pdf [file c3ra45645e.pdf]

## Electronic Supporting Information (ESI) for

### Stereo-Chemical Analysis of Racemization of a Chiral Bipyridine

Tao Wu\*, Xiao-Peng Zhang, and Xiao-Zeng You\*

*State Key Laboratory of Coordination Chemistry, Nanjing National Laboratory of Microstructures, School of Chemistry and Chemical Engineering, Nanjing University, 210093 Nanjing, P. R. China*

S2- VCD and IR spectra of CHIRABIPY/CuCl<sub>2</sub> in CDCl<sub>3</sub> solution

S3- B3LYP/6-311++G\*\* optimized structure and energy of (*R*)-CHIRABIPY

S4- Packing Diagram of the (*R/S*)-CHIRABIPY/Pyromellitic Acid Co-Crystal

S5- X-ray Single Crystal Data of the Co-crystal

**Figure S1. VCD (upper) and IR (lower) spectra of CHIRABIPY/CuCl<sub>2</sub> (Precipitates) in CDCl<sub>3</sub> solution.**

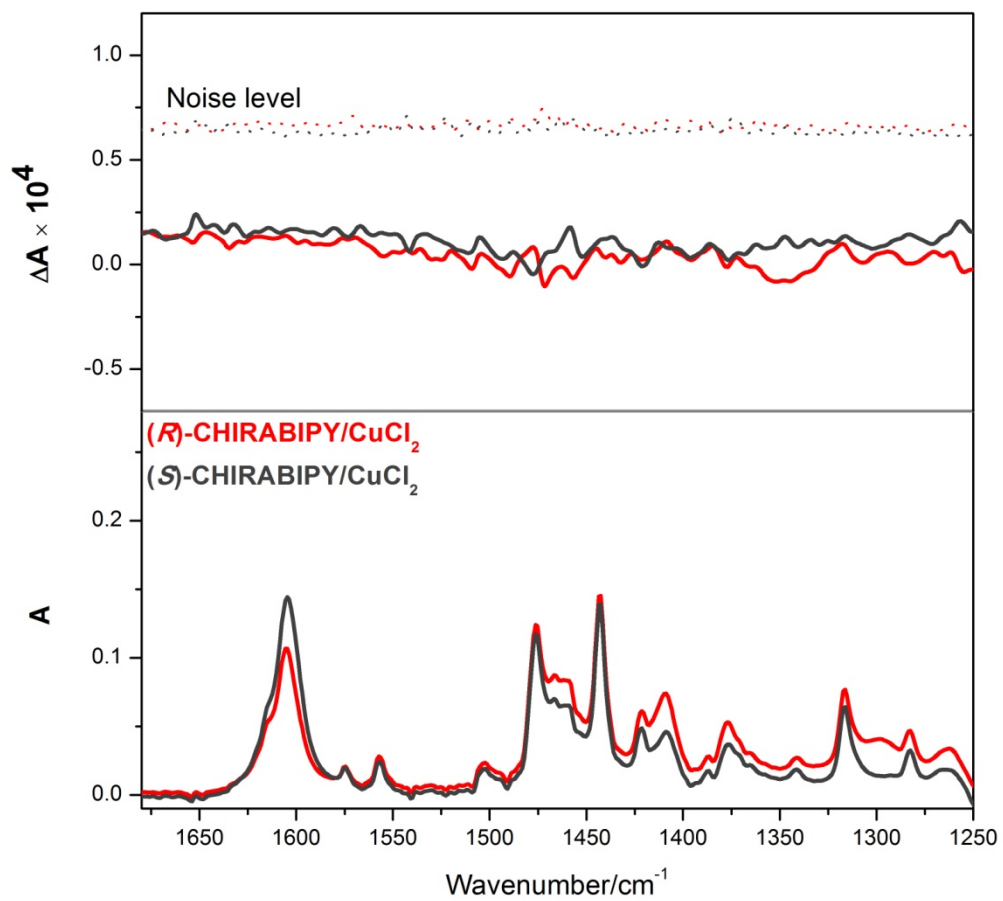

**Table S1. B3LYP/6-311++G\*\* Optimized Structure (Atom Coordinates) of (*R*)-CHIRABIPY**

|   |             |             |             |
|---|-------------|-------------|-------------|
| C | 5.58165000  | 0.37859400  | 0.20927200  |
| C | 4.64165800  | 1.40505300  | 0.14964200  |
| N | 3.32585100  | 1.19757300  | 0.04839800  |
| C | 2.87821700  | -0.06986600 | 0.00106000  |
| C | 3.75235200  | -1.16471000 | 0.05522000  |
| C | 5.11870400  | -0.93447200 | 0.16050700  |
| C | 1.40334700  | -0.26874100 | -0.11390200 |
| N | 0.95914900  | -1.53503300 | -0.16585000 |
| C | -0.35793500 | -1.74012400 | -0.27442500 |
| C | -1.30094100 | -0.71751500 | -0.33767500 |
| C | -0.83725200 | 0.60854400  | -0.27550900 |
| C | 0.52998700  | 0.82685100  | -0.16524500 |
| C | -2.78371000 | -0.92173300 | -0.49392100 |
| C | -3.28511000 | 1.14998100  | -0.48646000 |
| C | -1.86723000 | 1.72403800  | -0.31794500 |
| C | -3.25799400 | 0.06966300  | -1.60422500 |
| C | -3.56389800 | -0.01154800 | 0.53865500  |
| C | -5.05395300 | -0.37564100 | 0.60586800  |
| C | -3.03379700 | 0.11198500  | 1.96759900  |
| H | 6.63742700  | 0.60583700  | 0.29081100  |
| H | 4.96136400  | 2.44279300  | 0.18462100  |
| H | 3.35093800  | -2.16750400 | 0.01450100  |
| H | 5.81187900  | -1.76693300 | 0.20372900  |
| H | -0.68084100 | -2.77783100 | -0.31635400 |
| H | 0.93466300  | 1.82952700  | -0.11559400 |
| H | -3.06025700 | -1.97592800 | -0.56315300 |
| H | -4.02986000 | 1.94693800  | -0.55235000 |
| H | -1.63948500 | 2.40130400  | -1.14879400 |
| H | -1.79423200 | 2.32547900  | 0.59494900  |
| H | -4.24649300 | -0.17011500 | -1.99123900 |
| H | -2.57477500 | 0.23013100  | -2.44122900 |
| H | -5.18985100 | -1.31899600 | 1.14438700  |
| H | -5.60473400 | 0.39913100  | 1.14899100  |
| H | -5.51715400 | -0.48370100 | -0.37595400 |
| H | -1.97242900 | 0.35604700  | 2.01885500  |
| H | -3.58230600 | 0.89206400  | 2.50603900  |
| H | -3.18342200 | -0.82817800 | 2.50885300  |

**Table S2. B3LYP/6-311++G\*\* Calculated Absolute Energy of (*R*)-CHIRABIPY**

|                         | Gibbs free energy(hartree) |
|-------------------------|----------------------------|
| ( <i>R</i> )- CHIRABIPY | -768.069283                |

**Figure S2. Packing Diagram of the Structure of (*R/S*)-CHIRABIPY/Pyromellitic Acid Co-Crystal**

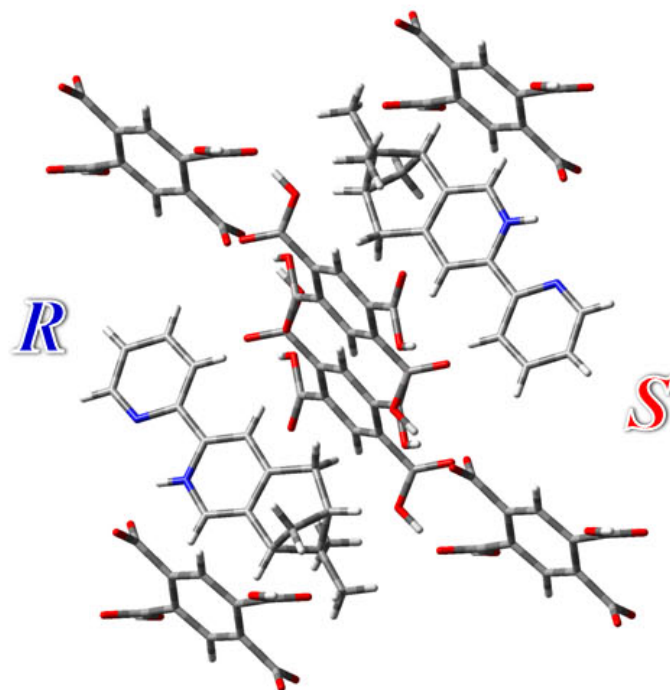

**Table S3. Crystal Data of (R/S)-CHIRABIPY/Pyromellitic Acid Co-Crystal:**

*Crystal data*

|                               |                                                                 |
|-------------------------------|-----------------------------------------------------------------|
| $C_{27}H_{24}N_2O_8$          | $\gamma = 82.960 (4)^\circ$                                     |
| $M_r = 504.48$                | $V = 1173.7 (4) \text{ \AA}^3$                                  |
| Triclinic, <i>P1</i>          | $Z = 2$                                                         |
| $a = 7.2917 (15) \text{ \AA}$ | Mo <i>K</i> $\alpha$ radiation, $\lambda = 0.71073 \text{ \AA}$ |
| $b = 10.673 (2) \text{ \AA}$  | $\mu = 0.11 \text{ mm}^{-1}$                                    |
| $c = 15.371 (3) \text{ \AA}$  | $T = 291 \text{ K}$                                             |
| $\alpha = 81.460 (4)^\circ$   | $0.12 \times 0.11 \times 0.10 \text{ mm}$                       |
| $\beta = 87.501 (4)^\circ$    |                                                                 |

*Data collection*

|                                                                |                                        |
|----------------------------------------------------------------|----------------------------------------|
| Bruker Smart Aepex CCD diffractometer                          | 4041 independent reflections           |
| Absorption correction: Multi-scan <i>SADABS</i> , Bruker, 2000 | 3395 reflections with $I > 2\sigma(I)$ |
| $T_{\min} = 0.987$ , $T_{\max} = 0.989$                        | $R_{\text{int}} = 0.041$               |
| 5825 measured reflections                                      |                                        |

*Refinement*

|                                 |                                                      |
|---------------------------------|------------------------------------------------------|
| $R[F^2 > 2\sigma(F^2)] = 0.077$ | 0 restraints                                         |
| $wR(F^2) = 0.180$               | H-atom parameters constrained                        |
| $S = 1.22$                      | $\Delta\rho_{\text{max}} = 0.46 \text{ e \AA}^{-3}$  |
| 4041 reflections                | $\Delta\rho_{\text{min}} = -0.30 \text{ e \AA}^{-3}$ |
| 336 parameters                  |                                                      |
